# Supplementary material for: Mandated Bacillus Calmette-Guérin (BCG) vaccination predicts flattened curves for the spread of COVID-19
Source: PubMed Central journal article supplement — Sci Adv. 2020 Aug 5;6(32):eabc1463. doi: 10.1126/sciadv.abc1463 (PMC7457335; doi:10.1126/sciadv.abc1463), 2020-08-05

## Supplementary Materials for

### **Mandated Bacillus Calmette-Guérin (BCG) vaccination predicts flattened curves for the spread of COVID-19**

Martha K. Berg<sup>\*</sup>, Qinggang Yu, Cristina E. Salvador, Irene Melani, Shinobu Kitayama<sup>\*</sup>

<sup>\*</sup>Corresponding author. Emails: [bergmk@umich.edu](mailto:bergmk@umich.edu) and [kitayama@umich.edu](mailto:kitayama@umich.edu)

Published 31 July 2020, *Sci. Adv.* **6**, eabc1463 (2020)  
DOI: 10.1126/sciadv.abc1463

#### **This PDF file includes:**

Supplementary text  
Tables S1 to S8  
Fig. S1

# Mandated Bacillus Calmette-Guérin (BCG) vaccination predicts flattened curves for the spread of COVID-19

## Supplementary Materials

### Supplementary analysis 1. Weighting country data based on underreporting index

We estimated a linear mixed model that was identical to that used in our main analysis, except that reporting index was included as a weighting factor in the model predicting the number of cases. Results were consistent with our main analysis, demonstrating that our effects are robust against differences in reporting quality across countries (see Table S3).

77 countries were included in this analysis. We found a significant main effect of day,  $b = 0.112$ ,  $p < .001$ , reflecting an exponential increase in cases over time. This increase was qualified by a significant interaction between day and the contrast between current and non-current BCG policy. Specifically, the growth rate of COVID-19 cases was significantly slower in countries with mandated BCG vaccinations, compared to countries without mandated BCG vaccinations,  $b = -0.030$ ,  $p = .006$ . Countries that once had such policies but terminated them before 2000 were not significantly different in growth rate from those that never instituted mandatory BCG vaccinations,  $b = -0.006$ ,  $p = .716$ . In sum, our focal effect was no different with reporting index added as a weighting factor. See Table S3 for full regression table.

### Supplementary analysis 2. Controlling for the total number of tests

We estimated linear mixed models that were identical to those used in our main analysis, except that the total number of tests for each country was included as a covariate in the model predicting the number of cases. Results were consistent with our main analysis, demonstrating that our effects are robust against differences in testing availability across countries (see Table S4).

64 countries were included in this analysis. We found a significant main effect of day,  $b = 0.112$ ,  $p < .001$ , reflecting an exponential increase in cases over time. This increase was qualified by a significant interaction between day and the contrast between current and non-current BCG policy. Specifically, the growth rate of COVID-19 cases was significantly slower in countries with mandated BCG vaccinations, compared to countries without mandated BCG vaccinations,  $b = -0.039$ ,  $p = .004$ . Countries that once had such policies but terminated them before 2000 were not significantly different in growth rate from those that never instituted mandatory BCG vaccinations,  $b = -0.009$ ,  $p = .702$ . In sum, our focal effect was no different with total tests added as a covariate. See Table S4 for full regression table.

### Supplementary analysis 3. Robustness check with 15-day time window

To test the robustness of our models, we conducted a set of analyses only using the first 15 days of data (rather than the first 30). The 15-day cutoff allowed us to examine more exclusively than the 30-day cutoff the very first phase of the outbreak in each country. Because our primary analysis included only countries that reported at least 15 days of eligible data, the same set of countries was included here (see Table S1 for full list for each analysis). All patterns were identical to the primary analyses.

#### A. Confirmed cases

We found a significant main effect of day,  $b = 0.157$ ,  $p < .001$ , reflecting an exponential increase in cases over time. This increase was qualified by a significant interaction between day and BCG policy. Specifically, the growth rate of COVID-19 cases was significantly slower in countries with mandated BCG vaccinations, compared to countries without mandated BCG vaccinations,  $b = -0.052$ ,  $p = .001$ . Countries that once had such policies but terminated them before 2000 were not significantly different in growth rate from those that never instituted mandatory BCG vaccinations,  $b = 0.016$ ,  $p = .521$ . In sum, our focal effect was no different with

a shorter time window. See Table S5-A for full regression table and Figure S1-A and B for growth curves.

### **B. Deaths**

Similarly, we found a significant main effect of day,  $b = 0.174$ ,  $p < .001$ , reflecting an exponential increase in deaths over time. This increase was qualified by a significant interaction between day and BCG policy. Specifically, the growth rate of COVID-19 deaths was significantly slower in countries with mandated BCG vaccinations, compared to countries without mandated BCG vaccinations,  $b = -0.070$ ,  $p = .004$ . Countries that once had such policies but terminated them before 2000 were not significantly different in growth rate from those that never instituted mandatory BCG vaccinations,  $b = 0.018$ ,  $p = .671$ . In sum, our focal effect was no different with a shorter time window. See Table S5-B for full regression table and Figure S1-C and D for growth curves.

## **Supplementary analysis 4. Testing cultural dimensions**

We first dummy-coded BCG status (BCG currently mandated vs. BCG not currently mandated). We then tested each variable that varied significantly as a function of BCG policy status as an additional covariate in our primary models, to test our key finding (the interaction between day and the primary BCG contrast) would be observed after controlling for the cultural dimension. Since the cultural indices were not available for all the countries included in the main analyses, and moreover, different indices were available for different sets of countries, each cultural dimension was analyzed separately so as to preserve the maximal number of countries.

A series of t-tests revealed that countries that currently mandate BCG (compared to all others) were significantly lower in individualism, whereas they were higher in power distance (Table S6).

### **A. Confirmed cases**

To test whether the cultural dimensions shown to vary between the countries that differed in the BCG policy status might explain the effect of BCG policy status, we repeated the analyses reported in the main text with each of the cultural dimensions included as a covariate (see Tables S7-A and S8-A). 65 countries were included in each analysis. The key interaction between day and BCG policy status (contrasting countries that currently mandate BCG with those that do not) remained statistically significant when either individualism or power distance was added as a covariate.

### **B. Deaths**

We conducted the same two analyses to test whether individualism and power distance qualified the effect of BCG on the increase in deaths over time (see Tables S7-B and S8-B). 64 countries were included in each analysis. The key interaction between day and BCG policy status (contrasting countries that currently mandate BCG with those that do not) remained statistically significant when either individualism or power distance was added as a covariate.

## **Supplementary analysis 5. Predicting US cases and deaths if BCG were mandated**

We estimated the numbers of confirmed cases and deaths estimated for the U.S. if it had instituted a mandatory BCG vaccination policy decades ago. To do this, we used the "predict" function in R. In particular, we plugged the value of each predictor for the U.S. into the regression equation. The value for day was set at 14.5, corresponding to the centered value of day 30, the final U.S. data point (on April 1 and March 29, 2020, for the analysis of confirmed cases and deaths, respectively). The BCG vaccination policy status was set to be equal to the countries that currently have mandatory BCG vaccination policies. The values for all other predictors were taken from available current U.S. values. The output gives the predicted number of cases (using the confirmed cases model) and deaths (using the deaths model) after natural log transformation. We thus calculated the numbers on their original scale by exponentiating our

predicted value. This analysis applied to the number of cases yielded a predicted value of 11.621, which translates to 111403.711 cases (compared to the actual 213372 cases reported in the US by April 1). This analysis applied to the number of deaths yielded a predicted value of 6.149, which translates to 468.038 deaths (compared to the actual 2467 deaths reported in the US by March 29).

**Table S1.** List of all countries included in analysis of cases and deaths, with the date set as day 1 in each country. Countries with dates entered in columns 2 and 3 are those included in our analysis of cases and deaths, respectively.

| Country                  | Date of first 100 cases | Date of first death | BCG policy status    |
|--------------------------|-------------------------|---------------------|----------------------|
| Afghanistan              | 3.27.20                 | 3.22.20             | Currently mandated   |
| Albania                  | 3.23.20                 | 3.11.20             | Currently mandated   |
| Algeria                  | 3.21.20                 | 3.12.20             | Currently mandated   |
| Angola                   |                         | 3.29.20             | Currently mandated   |
| Argentina                | 3.20.20                 | 3.8.20              | Currently mandated   |
| Armenia                  | 3.19.20                 | 3.26.20             | Currently mandated   |
| Australia                | 3.10.20                 | 3.1.20              | Mandated in the past |
| Austria                  | 3.8.20                  | 3.12.20             | Mandated in the past |
| Azerbaijan               | 3.26.20                 | 3.13.20             | Currently mandated   |
| Bangladesh               | 4.6.20                  | 3.18.20             | Currently mandated   |
| Belarus                  | 3.30.20                 | 3.31.20             | Currently mandated   |
| Belgium                  | 3.6.20                  | 3.11.20             | Never mandated       |
| Belize                   |                         | 4.6.20              | Currently mandated   |
| Benin                    | 5.7.20                  | 4.6.20              | Currently mandated   |
| Bolivia                  | 3.31.20                 | 3.29.20             | Currently mandated   |
| Bosnia and Herzegovina   | 3.22.20                 | 3.21.20             | Currently mandated   |
| Botswana                 |                         | 3.31.20             | Currently mandated   |
| Brazil                   | 3.13.20                 | 3.17.20             | Currently mandated   |
| Bulgaria                 | 3.20.20                 | 3.11.20             | Currently mandated   |
| Burkina Faso             | 3.24.20                 | 3.18.20             | Currently mandated   |
| Burundi                  |                         | 4.13.20             | Currently mandated   |
| Cambodia                 | 3.29.20                 |                     | Currently mandated   |
| Cameroon                 | 3.29.20                 | 3.25.20             | Currently mandated   |
| Canada                   | 3.11.20                 | 3.9.20              | Never mandated       |
| Central African Republic | 5.8.20                  | 5.23.20             | Currently mandated   |
| Chad                     | 5.2.20                  | 4.28.20             | Currently mandated   |
| Chile                    | 3.16.20                 | 3.22.20             | Currently mandated   |
| China                    | 1.22.20                 | 1.23.20             | Currently mandated   |
| Colombia                 | 3.19.20                 | 3.22.20             | Currently mandated   |
| Costa Rica               | 3.21.20                 | 3.19.20             | Currently mandated   |
| Cote d'Ivoire            | 3.27.20                 | 3.29.20             | Currently mandated   |
| Croatia                  | 3.19.20                 | 3.19.20             | Currently mandated   |
| Cuba                     | 3.28.20                 | 3.18.20             | Currently mandated   |
| Czechia                  | 3.13.20                 | 3.22.20             | Currently mandated   |

|                    |         |         |                      |
|--------------------|---------|---------|----------------------|
| Denmark            | 3.10.20 | 3.14.20 | Mandated in the past |
| Dominican Republic | 3.21.20 | 3.17.20 | Currently mandated   |
| Ecuador            | 3.18.20 | 3.14.20 | Mandated in the past |
| Egypt              | 3.14.20 | 3.8.20  | Currently mandated   |
| El Salvador        | 4.9.20  | 3.31.20 | Currently mandated   |
| Equatorial Guinea  | 4.24.20 | 4.22.20 | Currently mandated   |
| Estonia            | 3.14.20 | 3.25.20 | Currently mandated   |
| Ethiopia           | 4.18.20 | 4.5.20  | Currently mandated   |
| Finland            | 3.13.20 | 3.21.20 | Currently mandated   |
| France             | 2.29.20 | 2.15.20 | Currently mandated   |
| Gabon              | 4.17.20 | 3.20.20 | Currently mandated   |
| Gambia             |         | 3.23.20 | Currently mandated   |
| Georgia            | 3.30.20 | 4.4.20  | Currently mandated   |
| Germany            | 3.1.20  | 3.9.20  | Mandated in the past |
| Ghana              | 3.26.20 | 3.21.20 | Currently mandated   |
| Greece             | 3.13.20 | 3.11.20 | Currently mandated   |
| Guatemala          | 4.10.20 | 3.16.20 | Currently mandated   |
| Guinea             | 4.4.20  | 4.15.20 | Currently mandated   |
| Guinea-Bissau      | 4.29.20 | 4.26.20 | Currently mandated   |
| Guyana             | 5.10.20 | 3.12.20 | Currently mandated   |
| Haiti              | 5.4.20  | 4.5.20  | Currently mandated   |
| Honduras           | 3.29.20 | 3.26.20 | Currently mandated   |
| Hungary            | 3.21.20 | 3.15.20 | Currently mandated   |
| India              | 3.14.20 | 3.11.20 | Currently mandated   |
| Indonesia          | 3.15.20 | 3.11.20 | Currently mandated   |
| Iran               | 2.26.20 | 2.19.20 | Currently mandated   |
| Iraq               | 3.13.20 | 3.4.20  | Currently mandated   |
| Ireland            | 3.14.20 | 3.11.20 | Currently mandated   |
| Israel             | 3.12.20 | 3.21.20 | Mandated in the past |
| Italy              | 2.23.20 | 2.21.20 | Never mandated       |
| Jamaica            | 4.15.20 | 3.19.20 | Currently mandated   |
| Japan              | 2.21.20 | 2.13.20 | Currently mandated   |
| Jordan             | 3.22.20 | 3.27.20 | Currently mandated   |
| Kazakhstan         | 3.26.20 | 3.20.20 | Currently mandated   |
| Kenya              | 4.2.20  | 3.26.20 | Currently mandated   |
| Kuwait             | 3.14.20 | 4.4.20  | Currently mandated   |
| Kyrgyzstan         | 3.31.20 | 4.3.20  | Currently mandated   |
| Latvia             | 3.20.20 | 4.3.20  | Currently mandated   |
| Lebanon            | 3.15.20 | 3.10.20 | Never mandated       |

|                 |         |         |                      |
|-----------------|---------|---------|----------------------|
| Liberia         | 4.21.20 | 4.4.20  | Currently mandated   |
| Libya           |         | 4.2.20  | Currently mandated   |
| Lithuania       | 3.22.20 | 3.21.20 | Currently mandated   |
| Luxembourg      | 3.17.20 | 3.14.20 | Mandated in the past |
| Madagascar      | 4.11.20 | 5.17.20 | Currently mandated   |
| Malawi          | 5.25.20 | 4.7.20  | Currently mandated   |
| Malaysia        | 3.9.20  | 3.17.20 | Currently mandated   |
| Mali            | 4.12.20 | 3.29.20 | Currently mandated   |
| Malta           | 3.23.20 | 4.8.20  | Currently mandated   |
| Mauritania      | 5.19.20 | 3.30.20 | Currently mandated   |
| Mexico          | 3.18.20 | 3.19.20 | Currently mandated   |
| Moldova         | 3.23.20 | 3.18.20 | Currently mandated   |
| Mongolia        | 5.16.20 |         | Currently mandated   |
| Morocco         | 3.22.20 | 3.10.20 | Currently mandated   |
| Mozambique      | 5.11.20 | 5.25.20 | Currently mandated   |
| Nepal           | 5.7.20  | 5.16.20 | Currently mandated   |
| Netherlands     | 3.6.20  | 3.6.20  | Never mandated       |
| New Zealand     | 3.22.20 | 3.29.20 | Mandated in the past |
| Nicaragua       | 5.19.20 | 3.27.20 | Currently mandated   |
| Niger           | 4.3.20  | 3.25.20 | Currently mandated   |
| Nigeria         | 3.29.20 | 3.23.20 | Currently mandated   |
| North Macedonia | 3.22.20 | 3.22.20 | Currently mandated   |
| Norway          | 3.6.20  | 3.14.20 | Currently mandated   |
| Oman            | 3.26.20 | 3.31.20 | Currently mandated   |
| Pakistan        | 3.16.20 | 3.19.20 | Currently mandated   |
| Panama          | 3.19.20 | 3.11.20 | Currently mandated   |
| Paraguay        | 4.5.20  | 3.21.20 | Currently mandated   |
| Peru            | 3.17.20 | 3.20.20 | Currently mandated   |
| Philippines     | 3.14.20 | 2.2.20  | Currently mandated   |
| Poland          | 3.14.20 | 3.12.20 | Currently mandated   |
| Portugal        | 3.13.20 | 3.17.20 | Currently mandated   |
| Qatar           | 3.11.20 | 3.28.20 | Currently mandated   |
| Romania         | 3.14.20 | 3.22.20 | Currently mandated   |
| Russia          | 3.17.20 | 3.19.20 | Currently mandated   |
| Rwanda          | 4.4.20  |         | Currently mandated   |
| Saudi Arabia    | 3.14.20 | 3.24.20 | Currently mandated   |
| Senegal         | 3.26.20 | 4.1.20  | Currently mandated   |
| Sierra Leone    | 4.28.20 | 4.23.20 | Currently mandated   |
| Singapore       | 2.29.20 | 3.21.20 | Currently mandated   |

|                      |         |         |                      |
|----------------------|---------|---------|----------------------|
| Slovakia             | 3.18.20 | 3.18.20 | Currently mandated   |
| Slovenia             | 3.13.20 | 3.14.20 | Currently mandated   |
| South Africa         | 3.18.20 | 3.27.20 | Currently mandated   |
| South Korea          | 2.20.20 | 2.20.20 | Currently mandated   |
| Spain                | 3.2.20  | 3.3.20  | Mandated in the past |
| Sri Lanka            | 3.24.20 | 3.28.20 | Currently mandated   |
| Sudan                | 4.20.20 | 3.13.20 | Currently mandated   |
| Sweden               | 3.6.20  | 3.11.20 | Mandated in the past |
| Switzerland          | 3.5.20  | 3.5.20  | Mandated in the past |
| Taiwan               | 3.18.20 | 2.16.20 | Currently mandated   |
| Tajikistan           | 5.3.20  | 5.2.20  | Currently mandated   |
| Tanzania             | 4.17.20 | 3.31.20 | Currently mandated   |
| Thailand             | 3.15.20 | 3.1.20  | Currently mandated   |
| Togo                 | 4.29.20 | 3.27.20 | Currently mandated   |
| Tunisia              | 3.24.20 | 3.19.20 | Currently mandated   |
| Turkey               | 3.19.20 | 3.17.20 | Currently mandated   |
| Uganda               | 5.6.20  |         | Currently mandated   |
| Ukraine              | 3.25.20 | 3.13.20 | Currently mandated   |
| United Arab Emirates | 3.18.20 | 3.20.20 | Currently mandated   |
| United Kingdom       | 3.5.20  | 3.6.20  | Currently mandated   |
| United States        | 3.3.20  | 2.29.20 | Never mandated       |
| Uruguay              | 3.20.20 | 3.28.20 | Currently mandated   |
| Uzbekistan           | 3.28.20 | 3.27.20 | Currently mandated   |
| Vietnam              | 3.22.20 |         | Currently mandated   |
| West Bank and Gaza   | 3.29.20 | 3.26.20 | Currently mandated   |
| Yemen                | 5.15.20 | 4.30.20 | Currently mandated   |
| Zambia               | 4.30.20 | 4.2.20  | Currently mandated   |
| Zimbabwe             | 5.27.20 | 3.23.20 | Currently mandated   |



**Table S2.** Correlation table of all predictor variables.

|                                       | <b>1</b> | <b>2</b> | <b>3</b> | <b>4</b> | <b>5</b> | <b>6</b> |
|---------------------------------------|----------|----------|----------|----------|----------|----------|
| <b>1.</b> BCG current vs. not current |          |          |          |          |          |          |
| <b>2.</b> BCG past vs. never          |          |          |          |          |          |          |
| <b>3.</b> GDP per capita              | -0.450   | 0.165    |          |          |          |          |
| <b>4.</b> Median age                  | -0.351   | -0.065   | 0.646    |          |          |          |
| <b>5.</b> Net migration rate          | -0.328   | 0.352    | 0.627    | 0.197    |          |          |
| <b>6.</b> Population                  | 0.029    | -0.360   | -0.059   | 0.028    | -0.024   |          |
| <b>7.</b> Population density          | 0.005    | -0.405   | 0.291    | 0.122    | 0.076    | 0.011    |

**Table S3.** Regression table predicting the natural log of cases, using the estimated proportion of cases that are being reported in each country as a weighting factor. Day is mean centered, and BCG policy variables are both contrast-coded. Population is natural log-transformed, and all covariates are standardized. This analysis is based on 77 countries.

| Predictor                         | Cases  |        |       |
|-----------------------------------|--------|--------|-------|
|                                   | b      | t      | p     |
| Intercept                         | 6.908  | 43.691 | <.001 |
| Day                               | 0.112  | 10.726 | <.001 |
| Median age                        | 0.219  | 1.890  | 0.067 |
| GDP per capita                    | 0.098  | 0.779  | 0.439 |
| Population density                | 0.120  | 0.425  | 0.672 |
| Net migration rate                | 0.234  | 1.723  | 0.090 |
| Population                        | 0.525  | 6.908  | <.001 |
| BCG past vs. never                | 0.153  | 0.494  | 0.623 |
| BCG current vs. not current       | -0.431 | -2.199 | 0.031 |
| Day x median age                  | 0.006  | 0.946  | 0.348 |
| Day x GDP per capita              | 0.011  | 1.691  | 0.096 |
| Day x population density          | 0.004  | 0.224  | 0.824 |
| Day x net migration rate          | 0.008  | 1.176  | 0.244 |
| Day x population                  | 0.035  | 8.446  | <.001 |
| Day x BCG past vs. never          | -0.006 | -0.365 | 0.716 |
| Day x BCG current vs. not current | -0.030 | -2.807 | 0.006 |

**Table S4.** Regression table predicting the natural log of cases, controlling for the total number of tests in each country. Day is mean centered, and BCG policy variables are both contrast-coded. Population is natural log-transformed, and all covariates are standardized. This analysis is based on 64 countries.

| Predictor                         | Cases  |         |       |
|-----------------------------------|--------|---------|-------|
|                                   | b      | t       | p     |
| Intercept                         | 6.754  | 175.361 | <.001 |
| Day                               | 0.112  | 8.499   | <.001 |
| Median age                        | 0.450  | 16.629  | <.001 |
| GDP per capita                    | 0.022  | 0.628   | 0.530 |
| Population density                | -0.154 | -2.341  | 0.019 |
| Net migration rate                | 0.230  | 6.868   | <.001 |
| Population                        | 0.402  | 15.712  | <.001 |
| Total tests                       | 0.182  | 7.236   | <.001 |
| BCG past vs. never                | 0.334  | 3.409   | 0.001 |
| BCG current vs. not current       | -0.464 | -7.950  | <.001 |
| Day x median age                  | 0.005  | 0.627   | 0.534 |
| Day x GDP per capita              | -0.004 | -0.475  | 0.637 |
| Day x population density          | 0.002  | 0.148   | 0.883 |
| Day x net migration rate          | 0.012  | 1.710   | 0.093 |
| Day x population                  | 0.028  | 4.684   | <.001 |
| Day x total tests                 | 0.012  | 2.183   | 0.033 |
| Day x BCG past vs. never          | -0.009 | -0.384  | 0.702 |
| Day x BCG current vs. not current | -0.039 | -3.017  | 0.004 |

**Table S5.** Regression tables predicting the natural log of (A) cases and (B) deaths, using a 15-day window (instead of a 30-day window, as in Table 1). Day is mean centered, and BCG policy variables are both contrast-coded. Population is natural log-transformed, and all covariates are standardized. This analysis is based on 134 and 135 countries for cases and deaths, respectively.

| Predictor                         | A. Cases |        |       | B. Deaths |        |       |
|-----------------------------------|----------|--------|-------|-----------|--------|-------|
|                                   | b        | t      | p     | b         | t      | p     |
| Intercept                         | 7.125    | 39.257 | <.001 | 2.717     | 7.577  | <.001 |
| Day                               | 0.157    | 14.422 | <.001 | 0.174     | 7.730  | <.001 |
| Median age                        | 0.343    | 2.803  | 0.008 | 0.252     | 1.141  | 0.257 |
| GDP per capita                    | 0.142    | 1.081  | 0.282 | 0.150     | 0.694  | 0.489 |
| Population density                | -0.153   | -2.096 | 0.038 | -0.038    | -0.308 | 0.759 |
| Net migration rate                | 0.106    | 0.921  | 0.359 | 0.069     | 0.366  | 0.715 |
| Population                        | 0.583    | 7.605  | <.001 | 0.720     | 5.639  | <.001 |
| BCG past vs. never                | 0.353    | 0.860  | 0.392 | 0.041     | 0.059  | 0.953 |
| BCG current vs. not current       | -0.716   | -3.016 | 0.003 | -1.058    | -2.670 | 0.009 |
| Day x median age                  | 0.023    | 3.081  | 0.004 | 0.022     | 1.623  | 0.108 |
| Day x GDP per capita              | 0.008    | 0.933  | 0.353 | 0.011     | 0.850  | 0.397 |
| Day x population density          | -0.008   | -1.763 | 0.080 | -0.005    | -0.694 | 0.489 |
| Day x net migration rate          | 0.004    | 0.560  | 0.576 | 0.006     | 0.536  | 0.593 |
| Day x population                  | 0.039    | 8.231  | <.001 | 0.043     | 5.587  | <.001 |
| Day x BCG past vs. never          | 0.016    | 0.643  | 0.521 | 0.018     | 0.426  | 0.671 |
| Day x BCG current vs. not current | -0.052   | -3.556 | 0.001 | -0.070    | -2.915 | 0.004 |

**Table S6.** Results from t-tests predicting each cultural dimension from BCG status (dummy-coded; 1 = currently mandated, 0 = mandated in the past or never mandated).

| Predictor      | N  | t      | p     |     |
|----------------|----|--------|-------|-----|
| Individualism  | 64 | -5.127 | <.001 | *** |
| Power distance | 64 | 5.026  | <.001 | *** |

**Table S7.** Regression table predicting the natural log of (A) cases and (B) deaths from BCG status, controlling for individualism, as well as all covariates in our primary model. Day is mean-centered. All covariates, including individualism, are standardized. This analysis is based on 65 and 64 countries for cases and deaths, respectively.

| Predictor                         | A. Cases |        |       | B. Deaths |        |       |
|-----------------------------------|----------|--------|-------|-----------|--------|-------|
|                                   | b        | t      | p     | b         | t      | p     |
| Intercept                         | 7.007    | 27.018 | <.001 | 2.527     | 5.015  | 0.001 |
| Day                               | 0.120    | 8.514  | <.001 | 0.146     | 6.333  | <.001 |
| Median age                        | -0.032   | -0.190 | 0.850 | 0.097     | 0.323  | 0.748 |
| GDP per capita                    | 0.382    | 2.042  | 0.046 | 0.394     | 1.190  | 0.239 |
| Population density                | -0.147   | -2.102 | 0.040 | -0.049    | -0.395 | 0.694 |
| Net migration rate                | 0.096    | 0.664  | 0.509 | -0.008    | -0.033 | 0.974 |
| Population                        | 0.627    | 7.400  | <.001 | 0.798     | 5.210  | <.001 |
| BCG past vs. never                | -0.103   | -0.284 | 0.777 | -0.548    | -0.848 | 0.400 |
| BCG current vs. not current       | -0.623   | -2.615 | 0.012 | -1.155    | -2.744 | 0.008 |
| Individualism                     | -0.007   | -1.455 | 0.151 | -0.012    | -1.400 | 0.167 |
| Day x median age                  | -0.004   | -0.432 | 0.668 | 0.003     | 0.237  | 0.814 |
| Day x GDP per capita              | 0.015    | 1.568  | 0.123 | 0.015     | 1.189  | 0.240 |
| Day x population density          | -0.000   | -0.132 | 0.896 | -0.002    | -0.424 | 0.673 |
| Day x net migration rate          | 0.005    | 0.635  | 0.528 | 0.007     | 0.700  | 0.487 |
| Day x population                  | 0.038    | 8.695  | <.001 | 0.042     | 7.079  | <.001 |
| Day x BCG past vs. never          | -0.012   | -0.639 | 0.525 | -0.026    | -1.035 | 0.305 |
| Day x BCG current vs. not current | -0.033   | -2.725 | 0.009 | -0.057    | -3.487 | 0.001 |
| Day x individualism               | 0.000    | 0.520  | 0.605 | -0.000    | -0.076 | 0.940 |

**Table S8.** Regression table predicting the natural log of (A) cases and (B) deaths from BCG status, controlling for power distance, as well as all covariates in our primary model. Day is mean-centered. All covariates, including power distance, are standardized. This analysis is based on 65 and 64 countries for cases and deaths, respectively.

| Predictor                         | A. Cases |        |       | B. Deaths |        |       |
|-----------------------------------|----------|--------|-------|-----------|--------|-------|
|                                   | b        | t      | p     | b         | t      | p     |
| Intercept                         | 6.997    | 28.116 | <.001 | 2.512     | 5.080  | 0.001 |
| Day                               | 0.121    | 8.406  | <.001 | 0.146     | 6.341  | <.001 |
| Median age                        | -0.043   | -0.249 | 0.804 | 0.057     | 0.182  | 0.856 |
| GDP per capita                    | 0.267    | 1.495  | 0.141 | 0.174     | 0.544  | 0.589 |
| Population density                | -0.113   | -1.643 | 0.106 | 0.022     | 0.179  | 0.859 |
| Net migration rate                | 0.142    | 0.976  | 0.334 | 0.078     | 0.309  | 0.759 |
| Population                        | 0.607    | 7.023  | <.001 | 0.772     | 4.946  | <.001 |
| BCG past vs. never                | -0.003   | -0.008 | 0.994 | -0.399    | -0.608 | 0.545 |
| BCG current vs. not current       | -0.508   | -2.144 | 0.037 | -0.929    | -2.224 | 0.030 |
| Power distance                    | 0.000    | 0.051  | 0.960 | -0.002    | -0.203 | 0.840 |
| Day x median age                  | -0.002   | -0.219 | 0.827 | 0.003     | 0.248  | 0.805 |
| Day x GDP per capita              | 0.020    | 2.167  | 0.035 | 0.015     | 1.246  | 0.218 |
| Day x population density          | -0.002   | -0.574 | 0.568 | -0.002    | -0.437 | 0.664 |
| Day x net migration rate          | 0.003    | 0.426  | 0.672 | 0.007     | 0.717  | 0.477 |
| Day x population                  | 0.038    | 8.699  | <.001 | 0.042     | 7.051  | <.001 |
| Day x BCG past vs. never          | -0.011   | -0.564 | 0.575 | -0.025    | -1.003 | 0.321 |
| Day x BCG current vs. not current | -0.038   | -3.215 | 0.002 | -0.057    | -3.577 | 0.001 |
| Day x power distance              | 0.000    | 0.878  | 0.384 | 0.000     | 0.095  | 0.924 |

**Figure S1.** Growth curves by country BCG policy in the first 15 days of country-wise outbreaks for (A-B) cases and (C-D) deaths, presented on linear (A & C) and logarithmic (B & D) scales.

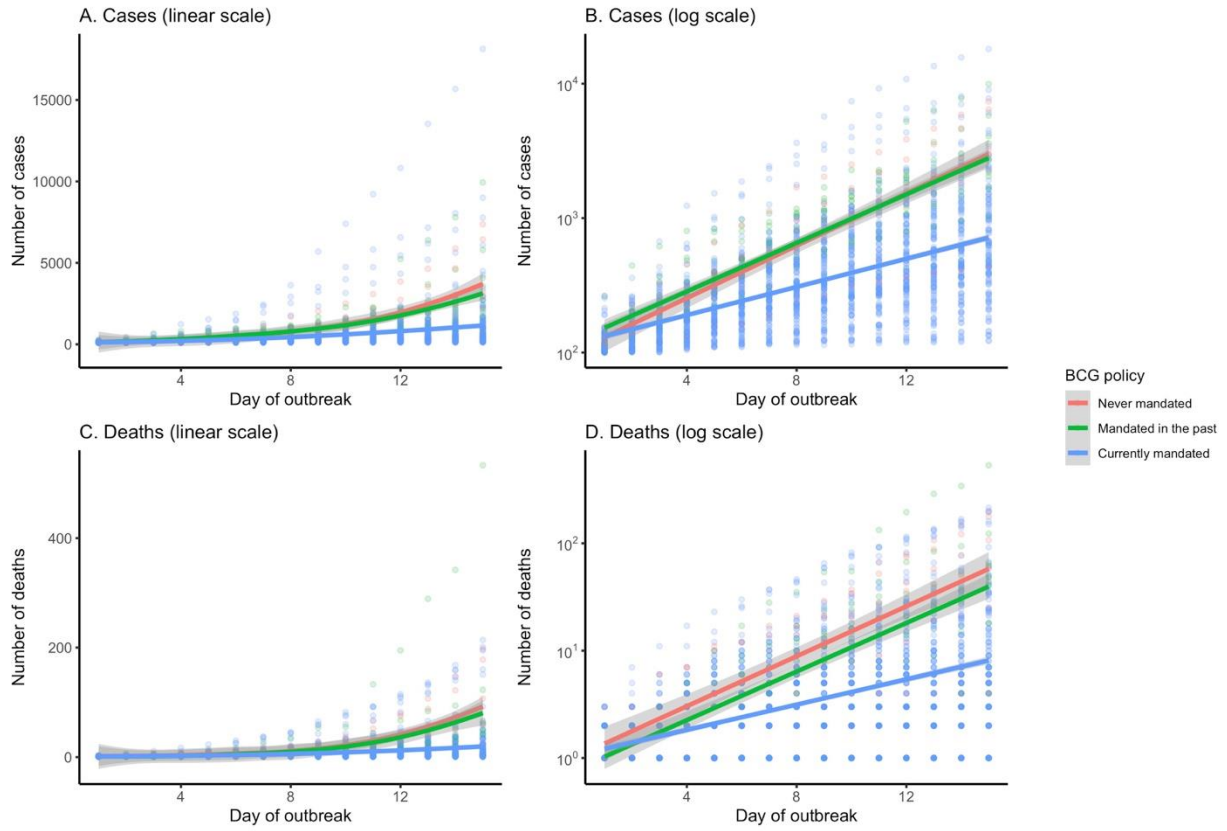

Supplement: abc1463_SM.pdf [file abc1463_SM.pdf]
